# Supplementary material
Source: PubMed Central journal article supplement (PMC7453348)
Supplement: jamaoncol-e202955-s003.pdf [file jamaoncol-e202955-s003.pdf]

## Data Sharing Statement

Schoenfeld. Neoadjuvant Nivolumab or Nivolumab Plus Ipilimumab in Untreated Oral Cavity Squamous Cell Carcinoma. *JAMA Oncol.* Published August 27, 2020. 10.1001/jamaoncol.2020.2955

### Data

**Data available:** No
